# Supplementary material
Source: publisher figshare collection journal article supplement (https://acs.figshare.com/ndownloader/files/3755455)

## Supporting Information

### Fabrication, Characterization and Biocompatibility of Polymer Cored Reduced Graphene

#### Oxide Nanofibers

*Lin Jin,<sup>†,‡</sup> Dingcai Wu,<sup>§\*</sup> Shreyas Kuddannaya,<sup>‡</sup> Yilei Zhang,<sup>‡\*</sup> Zhenling Wang<sup>†\*</sup>*

<sup>†</sup>The Key Laboratory of Rare Earth Functional Materials and Applications, Zhoukou Normal University, Zhoukou 466001, P. R. China

<sup>‡</sup>School of Mechanical & Aerospace Engineering, Nanyang Technological University, 50 Nanyang Avenue, Singapore 639798, Singapore Materials Science

<sup>§</sup>Institute, PCFM Lab and DSAPM Lab, School of Chemistry and Chemical Engineering, Sun Yat-sen University, Guangzhou 510275, P. R. China

#### AUTHOR INFORMATION

Dr. L. Jin, Prof. Z. L. Wang\*

<sup>†</sup>The Key Laboratory of Rare Earth Functional Materials and Applications, Zhoukou Normal University, Zhoukou 466001, P. R. China

E-mail: [zlwang2007@hotmail.com](mailto:zlwang2007@hotmail.com)

Fax: 86394-8178518; Tel: 86394-8178996

S. Kuddannaya, Prof. Y. L. Zhang\*

<sup>‡</sup>School of Mechanical & Aerospace Engineering, Nanyang Technological University, 50 Nanyang Avenue, Singapore 639798, Singapore Materials Science

E-mail: [ylzhang@ntu.edu.sg](mailto:ylzhang@ntu.edu.sg)

Prof. D. C. Wu\*

<sup>§</sup>Institute, PCFM Lab and DSAPM Lab, School of Chemistry and Chemical Engineering, Sun Yat-sen University, Guangzhou 510275, P. R. China

E-mail: [wudc@mail.sysu.edu.cn](mailto:wudc@mail.sysu.edu.cn)

**Figure S1.** Morphology of GO sheets. Typical AFM image and the corresponding height profile of the as-prepared GO sheets.

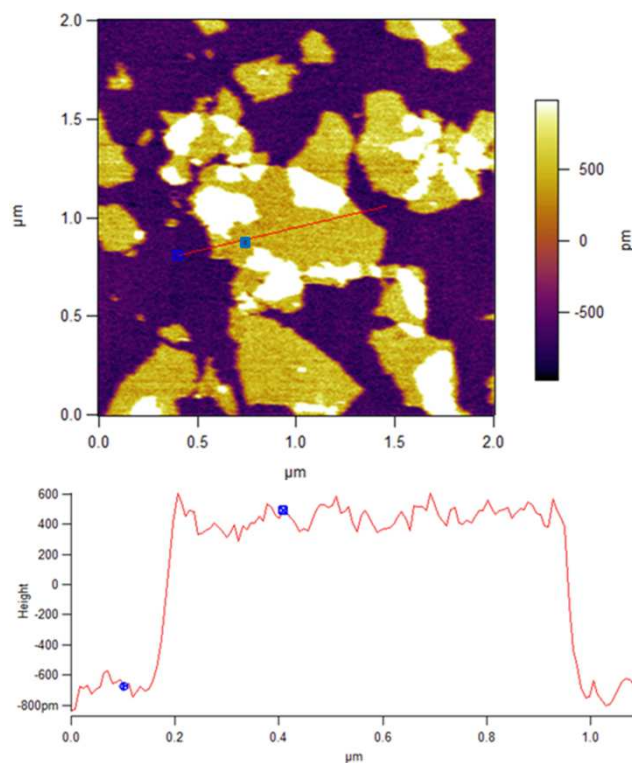

**Figure S2.** High magnification SEM image of nanofibers after peeled off using ultrasonication for 5s.

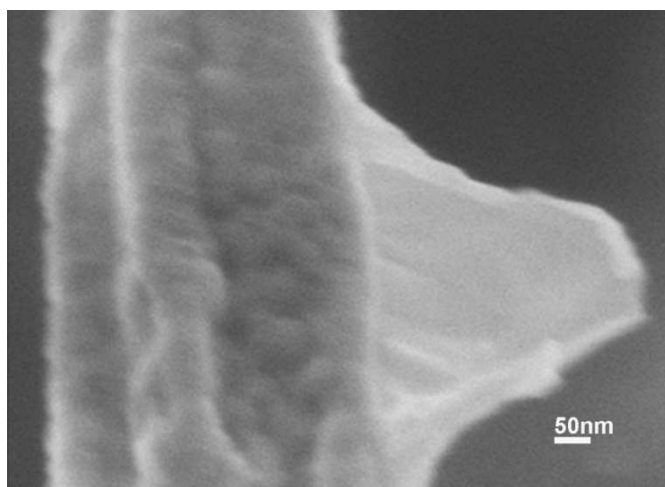

Supplement: Supplementary file 1 [file 3755455]
